# Supplementary material for: Cross-reactive CD4+ T cells enhance SARS-CoV-2 immune responses upon infection and vaccination
Source: PubMed Central journal article supplement (PMC10026850; doi:10.1126/science.abh1823), 2021-08-31
Supplement: science.abh1823_mdar_reproducibility_checklist.pdf [file science.abh1823_mdar_reproducibility_checklist.pdf]

## **Materials Design Analysis Reporting (MDAR) Checklist for Authors**

The MDAR framework establishes a minimum set of requirements in transparent reporting applicable to studies in the life sciences (see Statement of Task: [doi:10.31222/osf.io/9sm4x](https://doi.org/10.31222/osf.io/9sm4x)). The MDAR checklist is a tool for authors, editors and others seeking to adopt the MDAR framework for transparent reporting in manuscripts and other outputs. Please refer to the MDAR Elaboration Document for additional context for the MDAR framework.

## Materials

|                                                                                                                                                                                                         |                                                                                                                                                                                                                      |            |
|---------------------------------------------------------------------------------------------------------------------------------------------------------------------------------------------------------|----------------------------------------------------------------------------------------------------------------------------------------------------------------------------------------------------------------------|------------|
| <b>Antibodies</b>                                                                                                                                                                                       | <b>Yes (indicate where provided: page no/section/legend)</b>                                                                                                                                                         | <b>n/a</b> |
| For commercial reagents, provide supplier name, catalogue number and RRID, if available.                                                                                                                | Supplementary material file, Table S3, Page 15                                                                                                                                                                       |            |
| <b>Cell materials</b>                                                                                                                                                                                   | <b>Yes (indicate where provided: page no/section/legend)</b>                                                                                                                                                         | <b>n/a</b> |
| <b>Cell lines:</b> Provide species information, strain. Provide accession number in repository <b>OR</b> supplier name, catalog number, clone number, <b>OR</b> RRID                                    |                                                                                                                                                                                                                      | x          |
| <b>Primary cultures:</b> Provide species, strain, sex of origin, genetic modification status.                                                                                                           |                                                                                                                                                                                                                      | x          |
| <b>Experimental animals</b>                                                                                                                                                                             | <b>Yes (indicate where provided: page no/section/legend)</b>                                                                                                                                                         | <b>n/a</b> |
| <b>Laboratory animals:</b> Provide species, strain, sex, age, genetic modification status. Provide accession number in repository <b>OR</b> supplier name, catalog number, clone number, <b>OR</b> RRID |                                                                                                                                                                                                                      | x          |
| <b>Animal observed in or captured from the field:</b> Provide species, sex and age where possible                                                                                                       |                                                                                                                                                                                                                      | x          |
| <b>Model organisms:</b> Provide Accession number in repository (where relevant) <b>OR</b> RRID                                                                                                          |                                                                                                                                                                                                                      | x          |
| <b>Plants and microbes</b>                                                                                                                                                                              | <b>Yes (indicate where provided: page no/section/legend)</b>                                                                                                                                                         | <b>n/a</b> |
| <b>Plants:</b> provide species and strain, unique accession number if available, and source (including location for collected wild specimens)                                                           |                                                                                                                                                                                                                      | x          |
| <b>Microbes:</b> provide species and strain, unique accession number if available, and source                                                                                                           |                                                                                                                                                                                                                      | x          |
| <b>Human research participants</b>                                                                                                                                                                      | <b>Yes (indicate where provided: page no/section/legend)</b>                                                                                                                                                         | <b>n/a</b> |
| Identify authority granting ethics approval (IRB or equivalent committee(s), provide reference number for approval.                                                                                     | Material and Methods, Supplementary material file, page 2: <i>"This study was approved by the Institutional Review board of the Charité (EA/152/20) as stated in the material and methods section. "</i>             |            |
| Provide statement confirming informed consent obtained from study participants.                                                                                                                         | Material and Methods, Supplementary material file, page 2: <i>" Written informed consent was obtained from all included participants and the study was conducted in agreement with the declaration of Helsinki."</i> |            |
| Report on age and sex for all study participants.                                                                                                                                                       | Supplementary material file, Tables S1 and S2, pages 13 and 14                                                                                                                                                       |            |

## Design

|                                                                                                                                                                     |                                                                                                                                                                                     |            |
|---------------------------------------------------------------------------------------------------------------------------------------------------------------------|-------------------------------------------------------------------------------------------------------------------------------------------------------------------------------------|------------|
| <b>Study protocol</b>                                                                                                                                               | <b>Yes (indicate where provided: page no/section/legend)</b>                                                                                                                        | <b>n/a</b> |
| For clinical trials, provide the trial registration number <b>OR</b> cite DOI in manuscript.                                                                        |                                                                                                                                                                                     | x          |
| <b>Laboratory protocol</b>                                                                                                                                          | <b>Yes (indicate where provided: page no/section/legend)</b>                                                                                                                        | <b>n/a</b> |
| Provide DOI or other citation details if detailed step-by-step protocols are available.                                                                             |                                                                                                                                                                                     | x          |
| <b>Experimental study design (statistics details)</b>                                                                                                               | <b>Yes (indicate where provided: page no/section/legend)</b>                                                                                                                        | <b>n/a</b> |
| State whether and how the following have been done, <b>or</b> if they were not carried out.                                                                         |                                                                                                                                                                                     |            |
| Sample size determination                                                                                                                                           |                                                                                                                                                                                     | x          |
| Randomisation                                                                                                                                                       |                                                                                                                                                                                     | x          |
| Blinding                                                                                                                                                            |                                                                                                                                                                                     | x          |
| Inclusion/exclusion criteria                                                                                                                                        | The inclusion/exclusion criteria for SARS-CoV-2 unexposed and COVID-19 convalescent donors are indicated in the Materials and Methods section, Supplementary material file, page 2. | x          |
| <b>Sample definition and in-laboratory replication</b>                                                                                                              | <b>Yes (indicate where provided: page no/section/legend)</b>                                                                                                                        | <b>n/a</b> |
| State number of times the experiment was replicated in laboratory                                                                                                   | The experiment replication numbers of in vitro experiments are indicated in the figure legends.                                                                                     |            |
| Define whether data describe technical or biological replicates                                                                                                     | The donor numbers are specified in the figure legends, Material and Methods section as well as the Tables S1 and S2, Supplementary material file, pages 13 and 14..                 |            |
| <b>Ethics</b>                                                                                                                                                       | <b>Yes (indicate where provided: page no/section/legend)</b>                                                                                                                        | <b>n/a</b> |
| Studies involving human participants: State details of authority granting ethics approval (IRB or equivalent committee(s), provide reference number for approval.   | Material and Methods section, Supplementary material file page 2: " <i>This study was approved by the Institutional Review board of the Charité (EA/152/20).</i> "                  |            |
| Studies involving experimental animals: State details of authority granting ethics approval (IRB or equivalent committee(s), provide reference number for approval. |                                                                                                                                                                                     | x          |
| Studies involving specimen and field samples: State if relevant permits obtained, provide details of authority approving study; if none were required, explain why. |                                                                                                                                                                                     | x          |
| <b>Dual Use Research of Concern (DURC)</b>                                                                                                                          | <b>Yes (indicate where provided: page no/section/legend)</b>                                                                                                                        | <b>n/a</b> |
| If study is subject to dual use research of concern, state the authority granting approval and reference number for the regulatory approval                         |                                                                                                                                                                                     | x          |

## Analysis

| <b>Attrition</b>                                                                                                                              | <b>Yes (indicate where provided: page no/section/legend)</b> | <b>n/a</b> |
|-----------------------------------------------------------------------------------------------------------------------------------------------|--------------------------------------------------------------|------------|
| State if sample or data point from the analysis is excluded, and whether the criteria for exclusion were determined and specified in advance. | No information/data point was excluded.                      |            |

| <b>Statistics</b>                                            | <b>Yes (indicate where provided: page no/section/legend)</b>                                                                                                                                                                                                                                                                                                                                                                                                                                                                | <b>n/a</b> |
|--------------------------------------------------------------|-----------------------------------------------------------------------------------------------------------------------------------------------------------------------------------------------------------------------------------------------------------------------------------------------------------------------------------------------------------------------------------------------------------------------------------------------------------------------------------------------------------------------------|------------|
| Describe statistical tests used and justify choice of tests. | For comparison of individual repeated measurements of the same donors paired Student's t test, for different donors/cohorts unpaired Student's t-test were used. Comparison of multiple measurement timepoints to one timepoint: repeated measure one-way-ANOVA with Dunnett's correction<br>Correlation of two parameters: Pearson r correlation<br>Mean (linear)/geometric mean (logarithmic scale) are displayed.<br>The statistical information is provided in the figure legends and the Material and Methods section. |            |

| <b>Data Availability</b>                                                                                     | <b>Yes (indicate where provided: page no/section/legend)</b>                                                                                                        | <b>n/a</b> |
|--------------------------------------------------------------------------------------------------------------|---------------------------------------------------------------------------------------------------------------------------------------------------------------------|------------|
| State whether newly created datasets are available, including protocols for access or restriction on access. | The Acknowledgment section includes a data and material availability statement: <i>"All data are available in the main text or in the supplementary materials."</i> |            |
| If data are publicly available, provide accession number in repository or DOI or URL.                        |                                                                                                                                                                     | x          |
| If publicly available data are reused, provide accession number in repository or DOI or URL, where possible. |                                                                                                                                                                     | x          |

| <b>Code Availability</b>                                                                            | <b>Yes (indicate where provided: page no/section/legend)</b> | <b>n/a</b> |
|-----------------------------------------------------------------------------------------------------|--------------------------------------------------------------|------------|
| For all newly generated code and software essential for replicating the main findings of the study: |                                                              | x          |
| State whether the code or software is available.                                                    |                                                              | x          |
| If code is publicly available, provide accession number in repository, or DOI or URL.               |                                                              | x          |

## Reporting

| <b>Adherence to community standards</b>                                                                                                                                                                                                  | <b>Yes (indicate where provided: page no/section/legend)</b> | <b>n/a</b> |
|------------------------------------------------------------------------------------------------------------------------------------------------------------------------------------------------------------------------------------------|--------------------------------------------------------------|------------|
| MDAR framework recommends adoption of discipline-specific guidelines, established and endorsed through community initiatives. Journals have their own policy about requiring specific guidelines and recommendations to complement MDAR. |                                                              |            |
| State if relevant guidelines (eg., ICMJE, MIBBI, ARRIVE) have been followed, and whether a checklist (eg., CONSORT, PRISMA, ARRIVE) is provided with the manuscript.                                                                     |                                                              | x          |
